# Supplementary material for: Interaction of Ligands for PET with the Dopamine D3 Receptor: In Silico and In Vitro Methods
Source: PubMed Central journal article supplement (PMC8065765; doi:10.3390/biom11040529), 2021-04-02
Supplement: biomolecules-11-00529-s001.pdf [file biomolecules-11-00529-s001.pdf]

Article

# Interaction of PET Radioligands with the Dopamine D3 Receptor: In Silico and In Vitro Methods

Chia-Ju Hsieh <sup>1</sup>, Aladdin Riad <sup>1</sup>, Ji Youn Lee <sup>1</sup>, Kristoffer Sahlholm <sup>2</sup>, Kuiying Xu <sup>1</sup>, Robert R. Luedtke <sup>3</sup>, Robert H. Mach <sup>1,\*</sup>

<sup>1</sup> Division of Nuclear Medicine and Clinical Molecular Imaging, Department of Radiology, Perelman School of Medicine, University of Pennsylvania, Philadelphia, PA 19104, USA; chiahs@pennmedicine.upenn.edu (C.-J.H.); Aladdin.Riad@pennmedicine.upenn.edu (A.R.); JiYoun.Lee@Pennmedicine.upenn.edu (J.Y.L.); kuxu@pennmedicine.upenn.edu (K.X.)

<sup>2</sup> Department of Integrative Medical Biology, Wallenberg Center for Molecular Medicine, Umea University, Umea 901 87, Sweden; kristoffer.sahlholm@ki.se

<sup>3</sup> Department of Pharmacology and Neuroscience, University of North Texas Health Science Center-Fort Worth, Texas, TE 76107, USA; Robert.Luedtke@unthsc.edu

\* Correspondence: rmach@pennmedicine.upenn.edu

**Table S1.** Total MM/GBSA energy (kcal/mol) contribution of residues in the binding pocket.

| Residue                         | Fallypride        | FTP               | KX-02-065         |
|---------------------------------|-------------------|-------------------|-------------------|
| Ligand                          | $-30.29 \pm 2.04$ | $-32.21 \pm 1.97$ | $-25.44 \pm 1.90$ |
| <i>Orthosteric binding Site</i> |                   |                   |                   |
| SER196                          | $-0.43 \pm 0.26$  | $-0.28 \pm 0.27$  | $-0.31 \pm 0.22$  |
| TYR365                          | $-0.45 \pm 0.79$  | $-1.35 \pm 0.65$  | $-0.17 \pm 0.30$  |
| PHE345                          | $-1.94 \pm 0.47$  | $-2.27 \pm 0.38$  | $-2.24 \pm 0.41$  |
| ASP110                          | $1.65 \pm 1.28$   | $2.18 \pm 1.19$   | $1.70 \pm 1.11$   |
| HIS349                          | $-0.39 \pm 0.53$  | $-0.39 \pm 0.34$  | $-0.53 \pm 0.38$  |
| TYR373                          | $-0.76 \pm 0.50$  | $-0.46 \pm 0.41$  | $-0.53 \pm 0.33$  |
| SER192                          | $-0.41 \pm 0.34$  | $-0.64 \pm 0.34$  | $-0.46 \pm 0.29$  |
| CYS114                          | $-0.62 \pm 0.36$  | $-0.71 \pm 0.27$  | $-0.76 \pm 0.29$  |
| PHE346                          | $-0.70 \pm 0.36$  | $-0.58 \pm 0.32$  | $-0.69 \pm 0.38$  |
| VAL111                          | $-2.93 \pm 0.47$  | $-2.45 \pm 0.36$  | $-2.15 \pm 0.40$  |
| THR369                          | $-0.95 \pm 0.40$  | $-1.01 \pm 0.35$  | $-0.65 \pm 0.29$  |
| CYS181                          | $-0.20 \pm 0.29$  | $-0.65 \pm 0.36$  | $-0.12 \pm 0.11$  |
| ILE183                          | $-0.93 \pm 0.42$  | $-0.79 \pm 0.31$  | $-1.11 \pm 0.35$  |
| VAL189                          | $-0.82 \pm 0.28$  | $-0.54 \pm 0.19$  | $-0.63 \pm 0.21$  |
| SER182                          | $-0.45 \pm 0.58$  | $-0.06 \pm 0.17$  | $-0.28 \pm 0.31$  |
| PHE188                          | $-0.31 \pm 0.18$  | $-0.09 \pm 0.10$  | $-0.05 \pm 0.05$  |
| TRP342                          | $-0.23 \pm 0.25$  | $0.04 \pm 0.11$   | $-0.06 \pm 0.20$  |
| THR115                          | $-0.45 \pm 0.21$  | $-0.41 \pm 0.15$  | $-0.35 \pm 0.13$  |
| <i>Secondary binding Site</i>   |                   |                   |                   |
| LEU89                           | $-0.09 \pm 0.07$  | $-1.77 \pm 0.46$  | $-0.24 \pm 0.12$  |
| SER366                          | $-0.01 \pm 0.02$  | $-0.55 \pm 0.45$  | $-0.03 \pm 0.05$  |
| GLU90                           | $0.00 \pm 0.02$   | $0.38 \pm 0.74$   | $0.01 \pm 0.03$   |
| GLY94                           | $0.01 \pm 0.00$   | $-1.00 \pm 0.31$  | $0.00 \pm 0.00$   |
| TYR36                           | $0.06 \pm 0.03$   | $-0.04 \pm 0.13$  | $0.03 \pm 0.03$   |
| GLY93                           | $0.01 \pm 0.00$   | $-0.85 \pm 0.44$  | $0.01 \pm 0.00$   |

**Table S2.** Van der Waals MM/GBSA energy (kcal/mol) contribution of residues in the binding pocket.

| Residue                         | Fallypride        | FTP               | KX-02-065         |
|---------------------------------|-------------------|-------------------|-------------------|
| Ligand                          | $-24.94 \pm 1.67$ | $-31.15 \pm 2.02$ | $-20.97 \pm 1.49$ |
| <b>Orthosteric binding Site</b> |                   |                   |                   |
| SER196                          | $-0.73 \pm 0.24$  | $-0.45 \pm 0.23$  | $-0.48 \pm 0.18$  |
| TYR365                          | $-0.79 \pm 0.44$  | $-2.18 \pm 0.59$  | $-0.79 \pm 0.38$  |
| PHE345                          | $-2.22 \pm 0.40$  | $-2.27 \pm 0.35$  | $-2.29 \pm 0.38$  |
| ASP110                          | $-1.17 \pm 0.86$  | $-0.92 \pm 0.84$  | $-0.99 \pm 0.78$  |
| HIS349                          | $-1.49 \pm 0.32$  | $-1.00 \pm 0.29$  | $-1.10 \pm 0.32$  |
| TYR373                          | $-1.23 \pm 0.40$  | $-1.07 \pm 0.34$  | $-1.10 \pm 0.32$  |
| SER192                          | $-0.82 \pm 0.30$  | $-0.85 \pm 0.27$  | $-0.77 \pm 0.24$  |
| CYS114                          | $-0.99 \pm 0.30$  | $-0.85 \pm 0.23$  | $-0.91 \pm 0.25$  |
| PHE346                          | $-1.12 \pm 0.38$  | $-1.22 \pm 0.32$  | $-1.36 \pm 0.41$  |
| VAL111                          | $-2.53 \pm 0.41$  | $-2.15 \pm 0.33$  | $-1.93 \pm 0.35$  |
| THR369                          | $-1.32 \pm 0.39$  | $-1.21 \pm 0.36$  | $-0.83 \pm 0.28$  |
| CYS181                          | $-0.36 \pm 0.31$  | $-0.68 \pm 0.25$  | $-0.22 \pm 0.13$  |
| ILE183                          | $-0.89 \pm 0.40$  | $-0.77 \pm 0.30$  | $-1.06 \pm 0.34$  |
| VAL189                          | $-0.89 \pm 0.28$  | $-0.61 \pm 0.20$  | $-0.69 \pm 0.20$  |
| SER182                          | $-0.26 \pm 0.30$  | $-0.28 \pm 0.17$  | $-0.55 \pm 0.32$  |
| PHE188                          | $-0.42 \pm 0.19$  | $-0.25 \pm 0.14$  | $-0.18 \pm 0.07$  |
| TRP342                          | $-0.81 \pm 0.30$  | $-0.56 \pm 0.19$  | $-0.67 \pm 0.27$  |
| THR115                          | $-0.53 \pm 0.14$  | $-0.36 \pm 0.10$  | $-0.31 \pm 0.09$  |
| <b>Secondary binding Site</b>   |                   |                   |                   |
| LEU89                           | $-0.09 \pm 0.06$  | $-1.81 \pm 0.47$  | $-0.21 \pm 0.11$  |
| SER366                          | $-0.06 \pm 0.02$  | $-0.68 \pm 0.40$  | $-0.08 \pm 0.06$  |
| GLU90                           | $-0.02 \pm 0.01$  | $-1.34 \pm 0.51$  | $-0.03 \pm 0.01$  |
| GLY94                           | $-0.01 \pm 0.00$  | $-1.10 \pm 0.30$  | $-0.01 \pm 0.01$  |
| TYR36                           | $-0.08 \pm 0.04$  | $-0.26 \pm 0.11$  | $-0.10 \pm 0.04$  |
| GLY93                           | $0.00 \pm 0.00$   | $-0.87 \pm 0.33$  | $0.00 \pm 0.00$   |

**Table S3.** Electrostatic MM/GBSA energy (kcal/mol) contribution of residues in the binding pocket.

| Residue                         | Fallypride        | FTP               | KX-02-065         |
|---------------------------------|-------------------|-------------------|-------------------|
| Ligand                          | $-47.07 \pm 4.31$ | $-42.82 \pm 3.43$ | $-39.69 \pm 3.47$ |
| <b>Orthosteric binding Site</b> |                   |                   |                   |
| SER196                          | $-0.66 \pm 0.66$  | $0.40 \pm 0.42$   | $0.43 \pm 0.42$   |
| TYR365                          | $-2.49 \pm 1.91$  | $-2.70 \pm 1.63$  | $-1.28 \pm 0.68$  |
| PHE345                          | $-0.41 \pm 0.49$  | $-0.57 \pm 0.35$  | $-0.51 \pm 0.40$  |
| ASP110                          | $-49.82 \pm 2.54$ | $-47.55 \pm 1.79$ | $-47.60 \pm 2.46$ |
| HIS349                          | $-0.56 \pm 0.57$  | $-0.49 \pm 0.51$  | $-0.25 \pm 0.64$  |
| TYR373                          | $0.16 \pm 0.75$   | $0.46 \pm 0.79$   | $0.46 \pm 0.77$   |
| SER192                          | $-1.16 \pm 0.42$  | $-1.07 \pm 0.45$  | $-0.90 \pm 0.39$  |
| CYS114                          | $1.56 \pm 0.46$   | $1.46 \pm 0.46$   | $1.53 \pm 0.53$   |
| PHE346                          | $0.02 \pm 0.19$   | $-0.04 \pm 0.18$  | $-0.05 \pm 0.21$  |
| VAL111                          | $-1.02 \pm 0.28$  | $-0.87 \pm 0.28$  | $-0.82 \pm 0.29$  |
| THR369                          | $-2.62 \pm 0.60$  | $-0.64 \pm 0.57$  | $-1.92 \pm 0.43$  |
| CYS181                          | $-0.25 \pm 0.93$  | $-1.38 \pm 0.70$  | $-0.18 \pm 0.73$  |
| ILE183                          | $-0.02 \pm 0.17$  | $0.27 \pm 0.23$   | $0.26 \pm 0.27$   |
| VAL189                          | $-0.61 \pm 0.21$  | $-0.40 \pm 0.28$  | $-0.54 \pm 0.27$  |
| SER182                          | $-0.14 \pm 0.94$  | $0.65 \pm 0.56$   | $1.37 \pm 0.81$   |
| PHE188                          | $-0.42 \pm 0.19$  | $-0.30 \pm 0.15$  | $-0.30 \pm 0.15$  |

|                               |                   |                   |                   |
|-------------------------------|-------------------|-------------------|-------------------|
| TRP342                        | $-0.95 \pm 0.22$  | $-0.72 \pm 0.15$  | $-0.83 \pm 0.32$  |
| THR115                        | $0.19 \pm 0.29$   | $0.38 \pm 0.22$   | $0.39 \pm 0.21$   |
| <b>Secondary binding Site</b> |                   |                   |                   |
| LEU89                         | $0.85 \pm 0.13$   | $0.80 \pm 0.31$   | $0.74 \pm 0.11$   |
| SER366                        | $-1.14 \pm 0.39$  | $-0.96 \pm 0.53$  | $-1.05 \pm 0.31$  |
| GLU90                         | $-12.98 \pm 1.17$ | $-15.66 \pm 1.96$ | $-12.14 \pm 0.94$ |
| GLY94                         | $0.05 \pm 0.15$   | $0.20 \pm 0.28$   | $0.00 \pm 0.13$   |
| TYR36                         | $-0.20 \pm 0.30$  | $-0.24 \pm 0.44$  | $-0.30 \pm 0.21$  |
| GLY93                         | $0.24 \pm 0.09$   | $-0.04 \pm 0.42$  | $0.21 \pm 0.09$   |

**Table S4.** Ligand to residue pair MM/GBSA energy (kcal/mol) contribution.

| Residues                               | Fallypride        | FTP               | KX-02-065         |
|----------------------------------------|-------------------|-------------------|-------------------|
| <b>Orthosteric binding Site</b>        |                   |                   |                   |
| SER196                                 | $-1.62 \pm 0.35$  | $-1.06 \pm 0.25$  | $-1.02 \pm 0.24$  |
| TYR365                                 | $-1.93 \pm 1.47$  | $-4.34 \pm 1.05$  | $-1.44 \pm 0.73$  |
| PHE345                                 | $-4.16 \pm 0.68$  | $-4.43 \pm 0.55$  | $-4.58 \pm 0.59$  |
| ASP110                                 | $-12.93 \pm 1.71$ | $-10.46 \pm 1.11$ | $-10.01 \pm 1.40$ |
| HID349                                 | $-2.69 \pm 0.59$  | $-1.87 \pm 0.45$  | $-2.18 \pm 0.48$  |
| TYR373                                 | $-2.55 \pm 0.62$  | $-1.83 \pm 0.61$  | $-1.91 \pm 0.57$  |
| SER192                                 | $-1.74 \pm 0.37$  | $-1.87 \pm 0.37$  | $-1.52 \pm 0.32$  |
| CYS114                                 | $-1.64 \pm 0.33$  | $-1.50 \pm 0.26$  | $-1.62 \pm 0.29$  |
| PHE346                                 | $-1.94 \pm 0.59$  | $-1.84 \pm 0.51$  | $-2.11 \pm 0.65$  |
| VAL111                                 | $-4.85 \pm 0.65$  | $-4.09 \pm 0.46$  | $-3.63 \pm 0.55$  |
| THR369                                 | $-2.82 \pm 0.59$  | $-2.41 \pm 0.56$  | $-1.87 \pm 0.46$  |
| CYS181                                 | $-0.64 \pm 0.64$  | $-1.40 \pm 0.59$  | $-0.38 \pm 0.22$  |
| ILE183                                 | $-1.70 \pm 0.68$  | $-1.47 \pm 0.57$  | $-1.96 \pm 0.59$  |
| VAL189                                 | $-1.61 \pm 0.45$  | $-1.15 \pm 0.30$  | $-1.29 \pm 0.35$  |
| SER182                                 | $-1.05 \pm 1.15$  | $-0.41 \pm 0.39$  | $-1.16 \pm 0.69$  |
| PHE188                                 | $-0.77 \pm 0.29$  | $-0.30 \pm 0.24$  | $-0.18 \pm 0.11$  |
| TRP342                                 | $-1.44 \pm 0.44$  | $-0.67 \pm 0.29$  | $-0.89 \pm 0.47$  |
| THR115                                 | $-1.13 \pm 0.23$  | $-0.76 \pm 0.21$  | $-0.63 \pm 0.19$  |
| <b>Secondary binding Site</b>          |                   |                   |                   |
| LEU89                                  | $-0.14 \pm 0.12$  | $-2.96 \pm 0.71$  | $-0.47 \pm 0.21$  |
| SER366                                 | $-0.06 \pm 0.02$  | $-1.21 \pm 0.80$  | $-0.11 \pm 0.11$  |
| GLU90                                  | $-0.07 \pm 0.02$  | $-2.42 \pm 0.88$  | $-0.08 \pm 0.02$  |
| GLY94                                  | $-0.01 \pm 0.01$  | $-1.96 \pm 0.46$  | $-0.01 \pm 0.01$  |
| TYR36                                  | $-0.04 \pm 0.07$  | $-0.35 \pm 0.26$  | $-0.09 \pm 0.07$  |
| GLY93                                  | $0.00 \pm 0.00$   | $-1.95 \pm 0.71$  | $0.00 \pm 0.00$   |
| <b>Sum of Orthosteric binding Site</b> | $-43.86 \pm 0.76$ | $-40.14 \pm 0.55$ | $-36.68 \pm 0.57$ |
| <b>Sum of Secondary binding Site</b>   | $-0.32 \pm 0.06$  | $-10.87 \pm 0.67$ | $-0.76 \pm 0.10$  |
| <b>Total</b>                           | $-44.18 \pm 0.66$ | $-51.01 \pm 0.58$ | $-37.44 \pm 0.50$ |
